# Supplementary material for: Optogenetics and electron tomography for structure-function analysis of cochlear ribbon synapses
Source: eLife journal article supplement (doi:10.7554/elife.79494), 2022-12-23

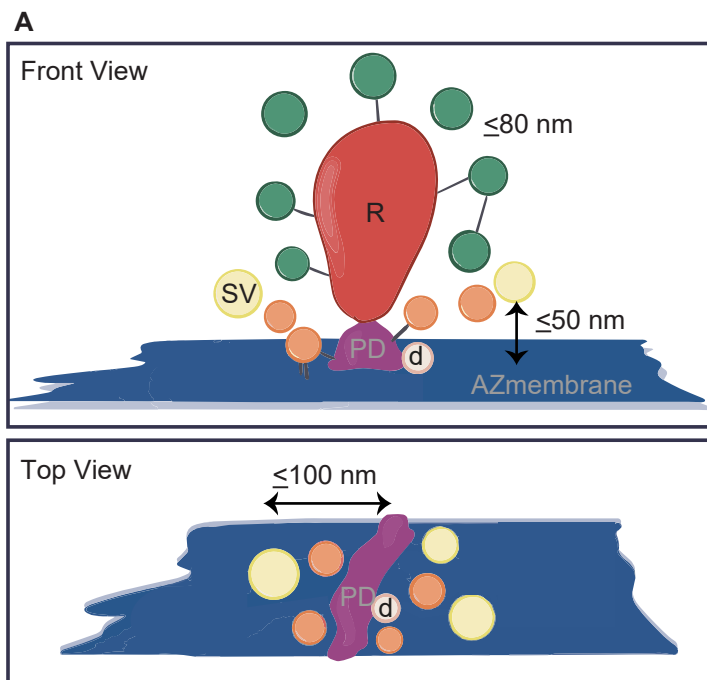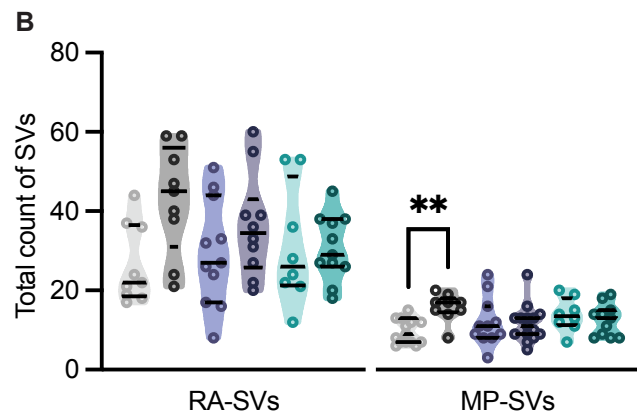

● Ribbon-Associated SVs

Membrane-Proximal SVs

● Non-tethered SV

● Tethered SV

○ d Docked SV

■ B6J Light

■ VC NoLight

■ VC ShortStim

■ VC LongStim

■ KI NoLight

■ KI LongStim

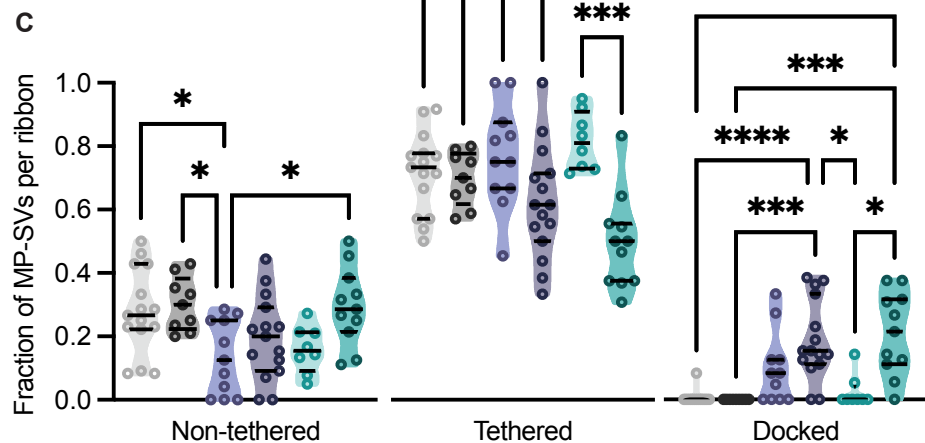

Supplement: supp [file elife-79494-supp-v1.zip]
