# Supplementary material for: Optogenetics and electron tomography for structure-function analysis of cochlear ribbon synapses
Source: eLife journal article supplement (doi:10.7554/elife.79494), 2022-12-23
Supplement: supp [file elife-79494-supp-v1.zip]

## Workflow

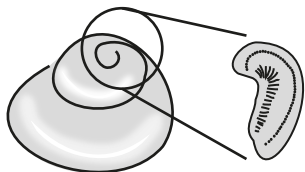

**1. Preparation of the  
OC apical turn**

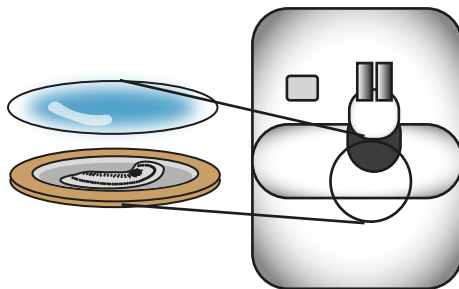

**2. Mounting**

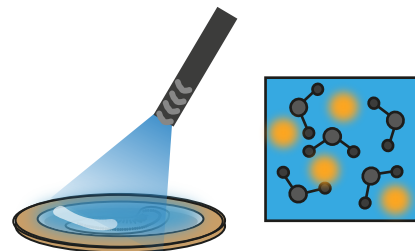

**3. HPM - Stimulation - Freezing**

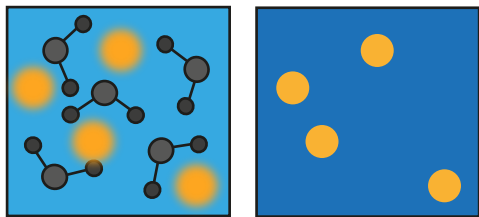

**4. Freeze-Substitution (FS)**

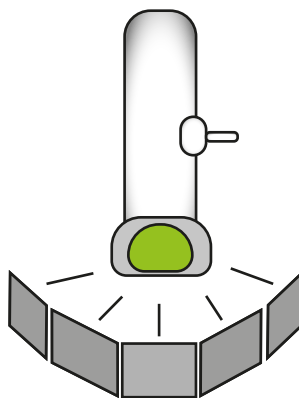

**5. Electron-tomography (ET)**

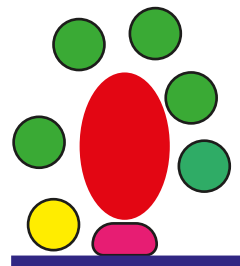

**6. Analysis**
