# Supplementary figures and images for: Optogenetics and electron tomography for structure-function analysis of cochlear ribbon synapses
Source: eLife journal article supplement (doi:10.7554/elife.79494), 2022-12-23

**A**Ai32KI cre<sup>+</sup>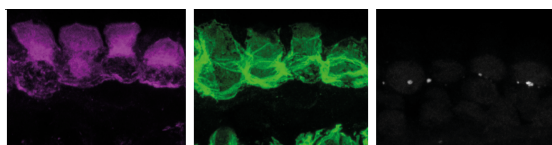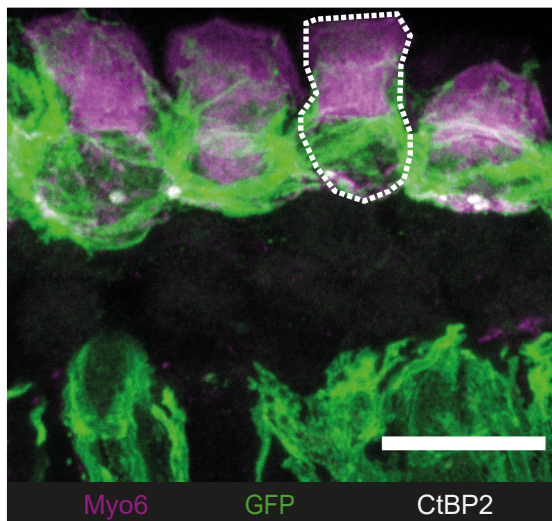

WT

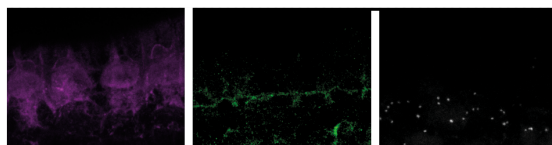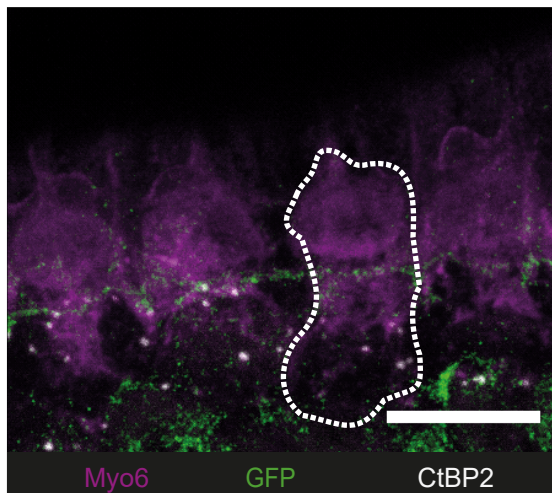

G2: 6-7 months old

**B**Ai32KI cre<sup>+</sup>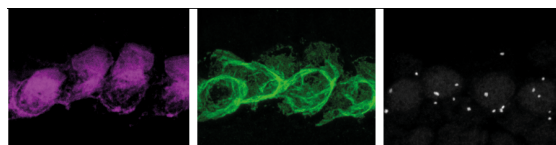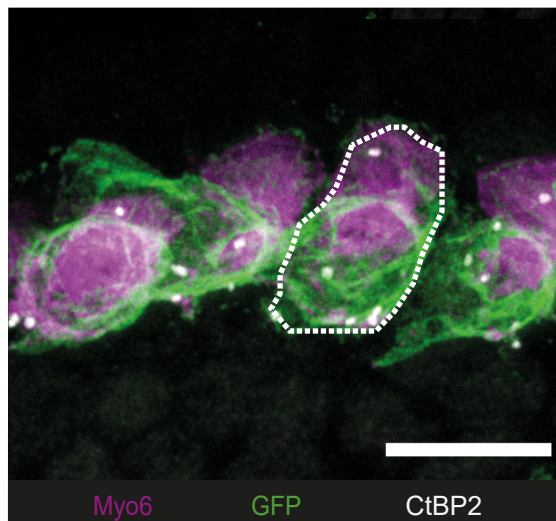

WT

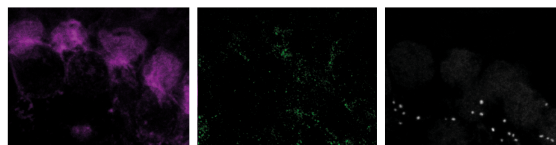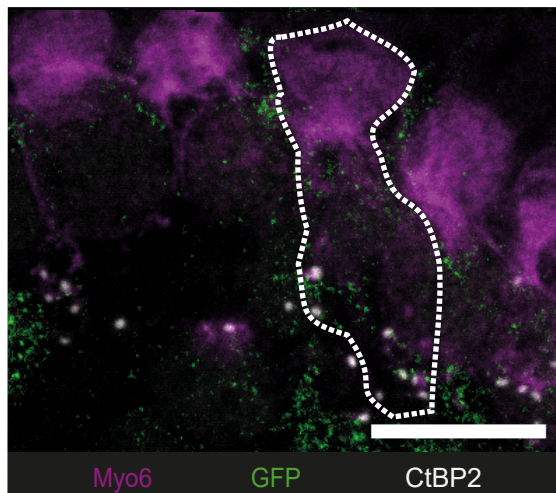

G3: 9-12 months old

Supplement: supp [file elife-79494-supp-v1.zip]

**A**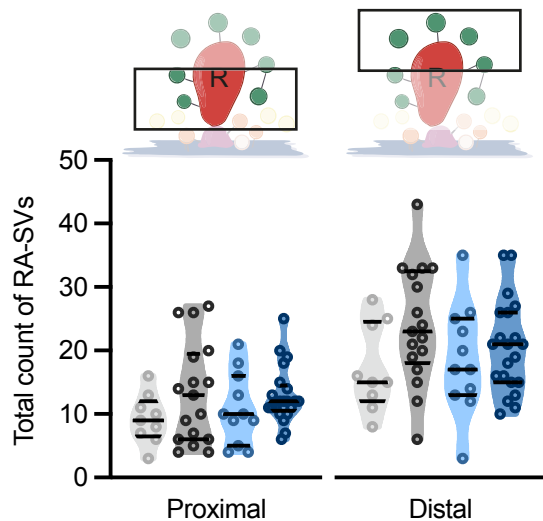**B**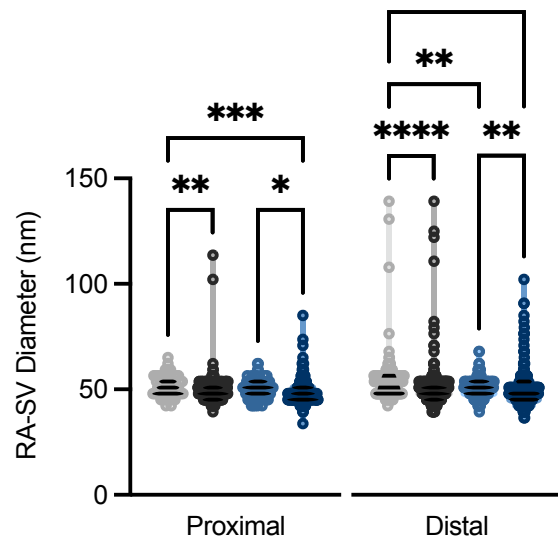**C**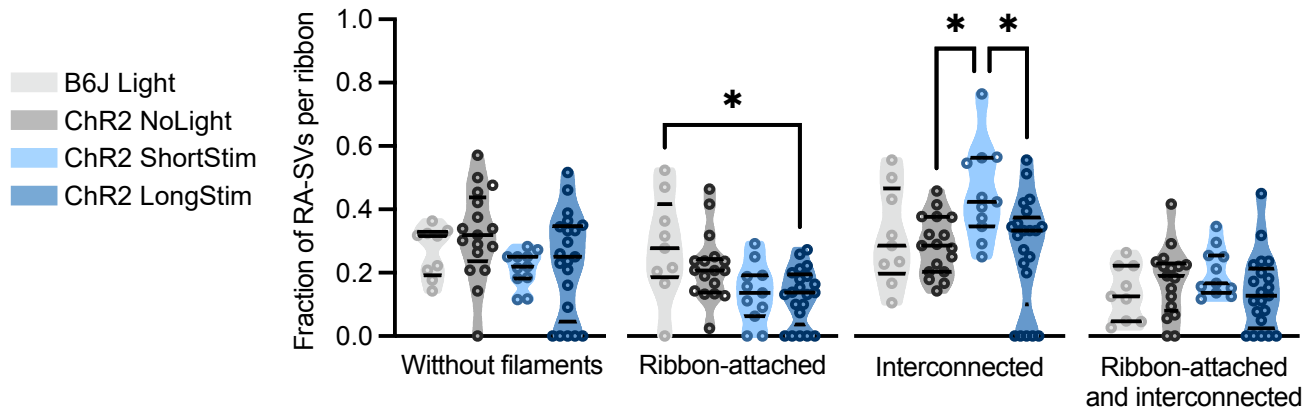

Supplement: supp [file elife-79494-supp-v1.zip]

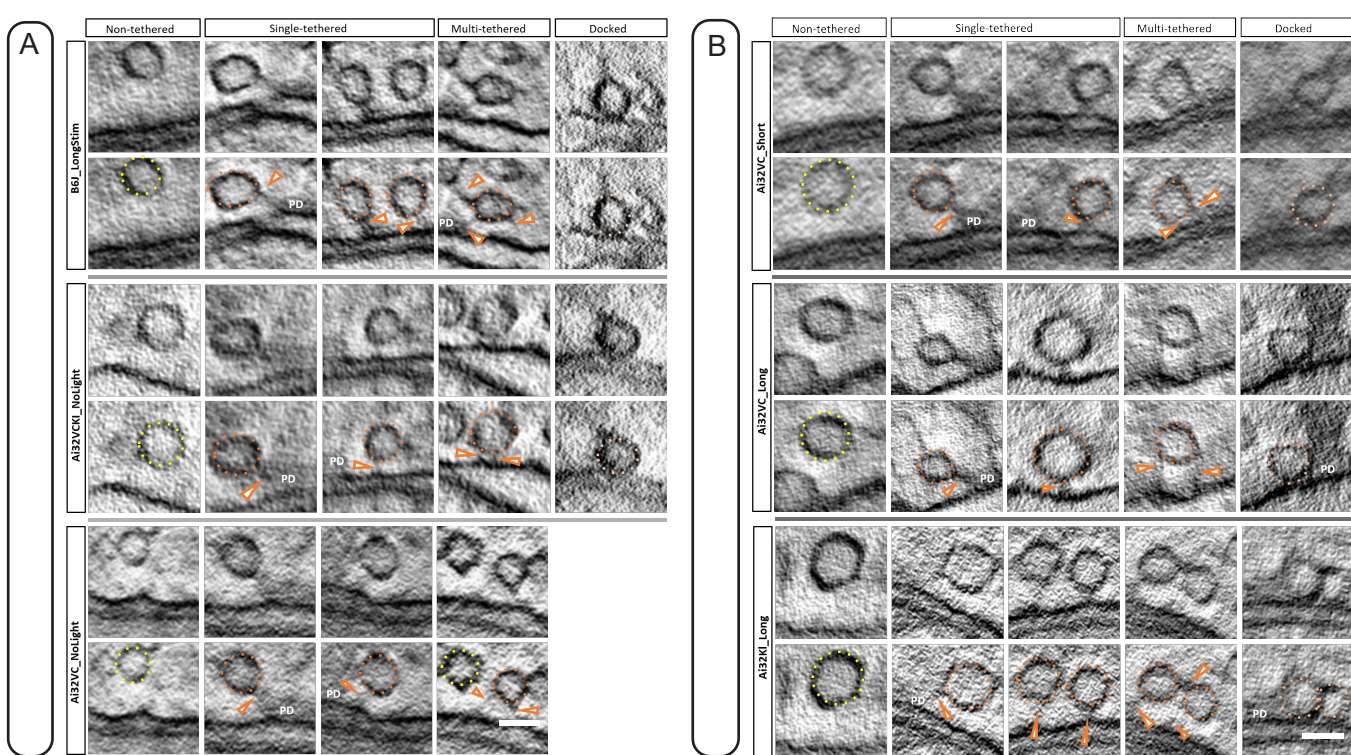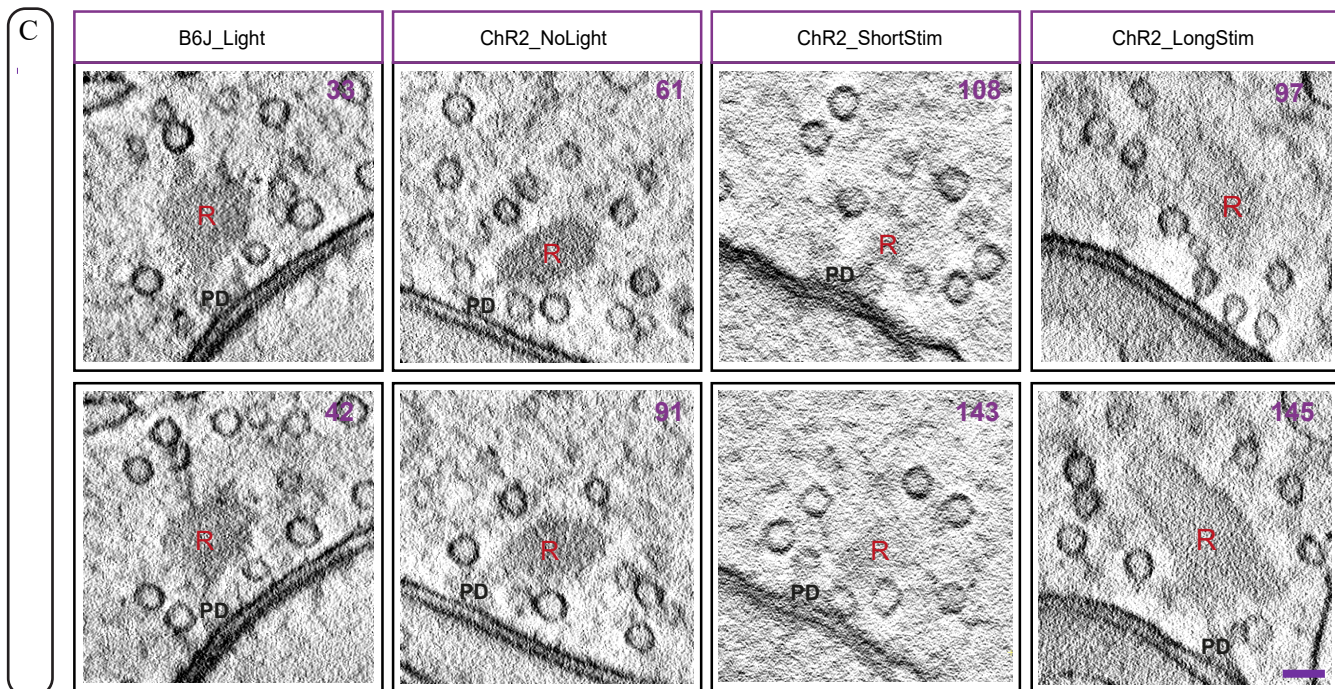

Supplement: supp [file elife-79494-supp-v1.zip]

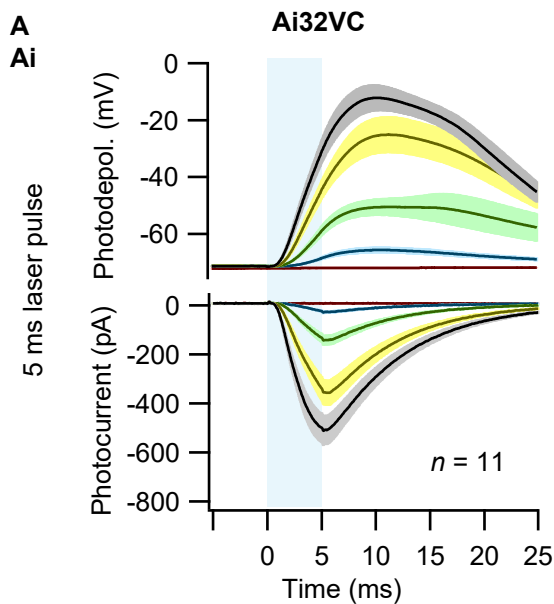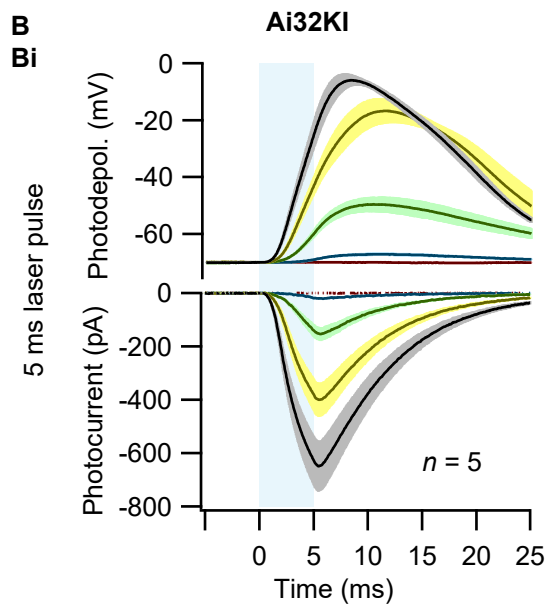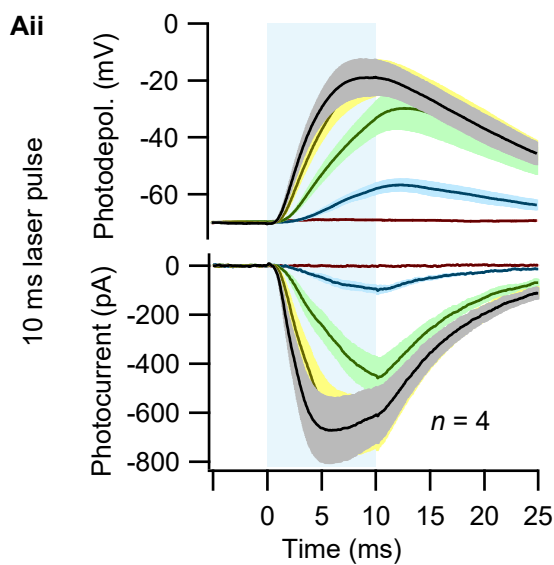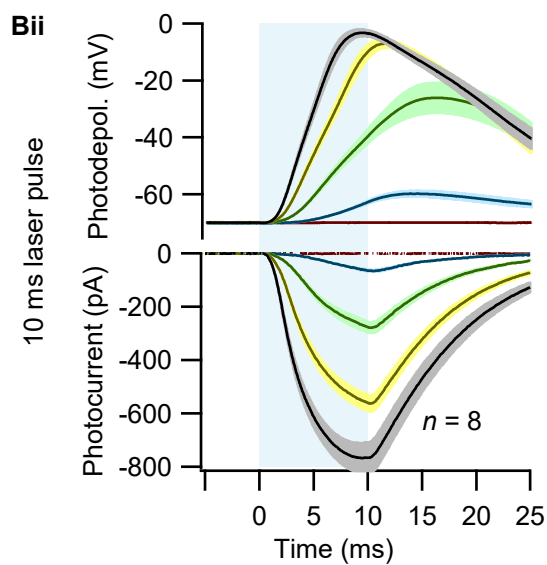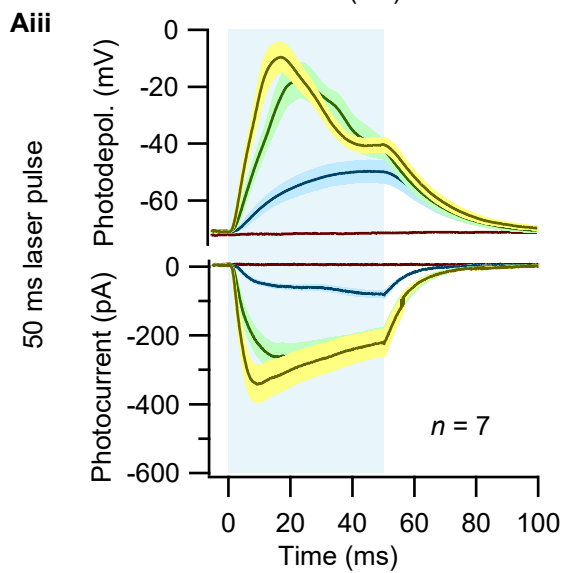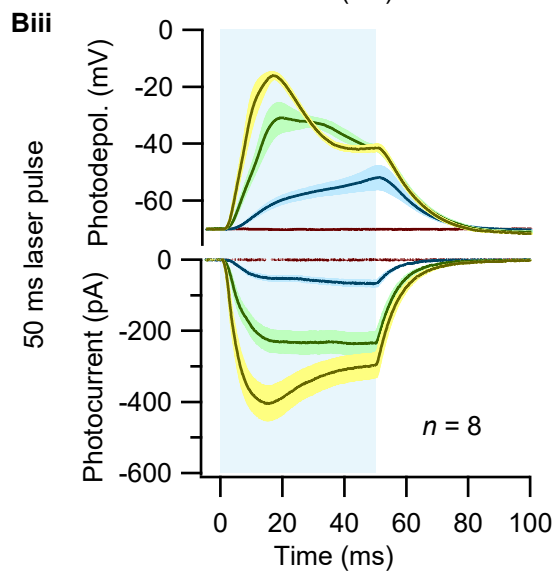

Supplement: supp [file elife-79494-supp-v1.zip]

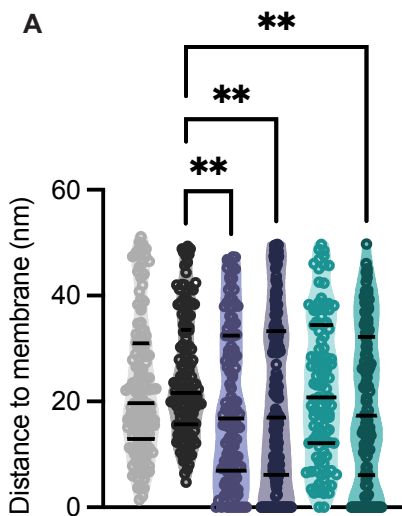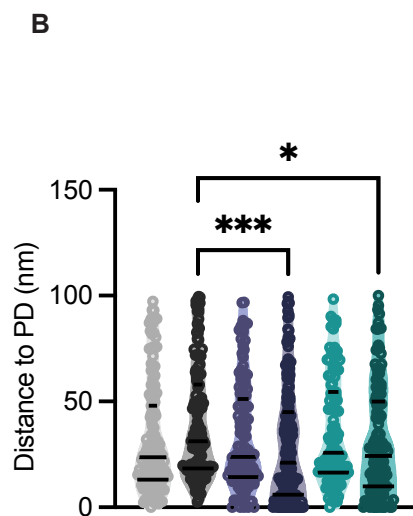

**C**

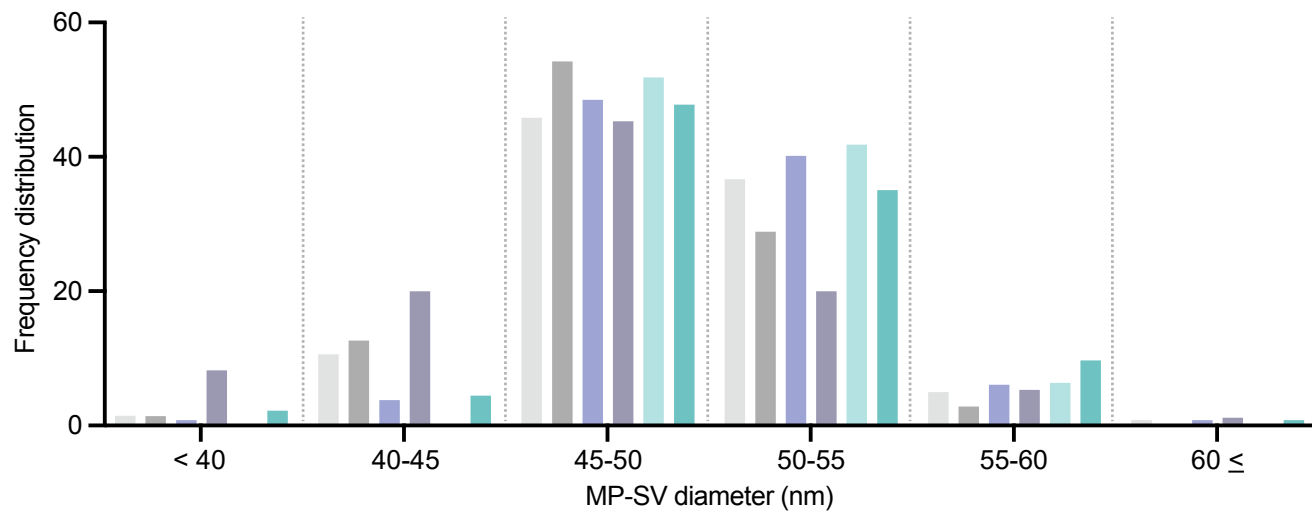

Supplement: supp [file elife-79494-supp-v1.zip]
